# Supplementary material for: Sexual recombination and increased mutation rate expedite evolution of Escherichia coli in varied fitness landscapes
Source: PubMed Central journal article supplement (PMC5727395; doi:10.1038/s41467-017-02323-4), 2017-12-13
Supplement: 41467_2017_2323_MOESM1_ESM.pdf [file 41467_2017_2323_MOESM1_ESM.pdf]

1

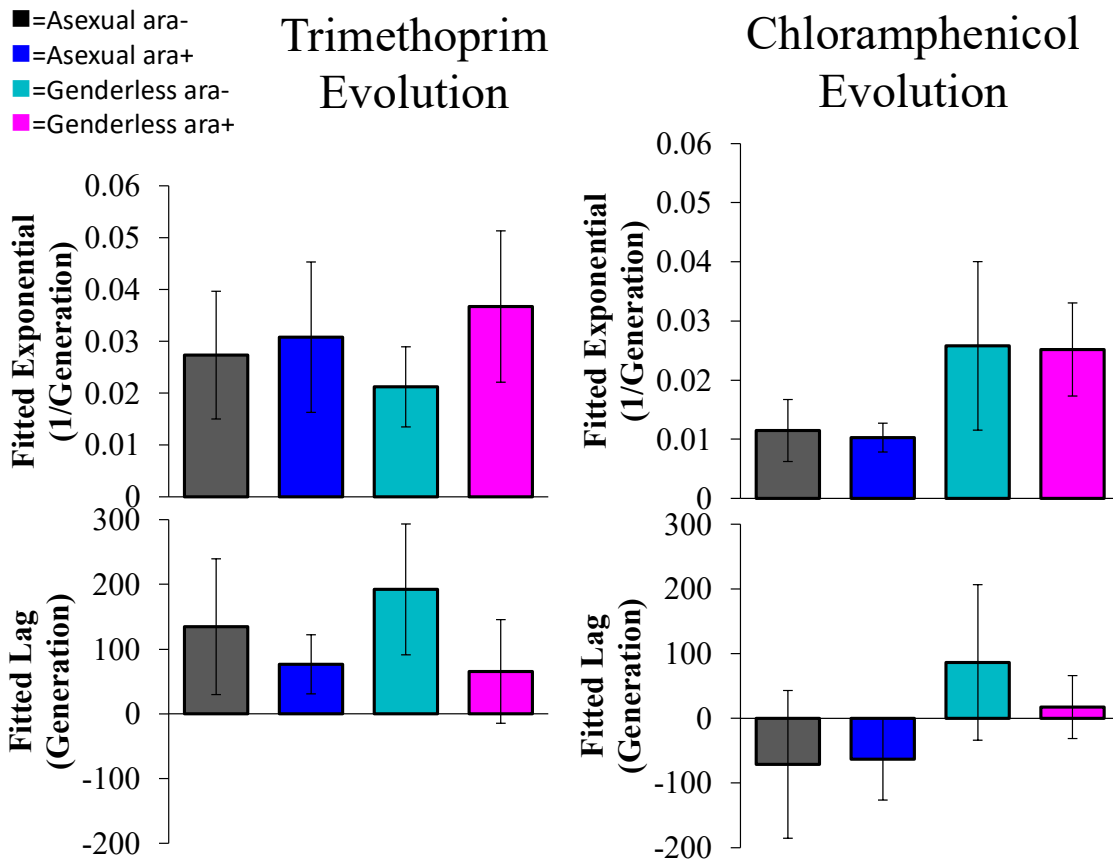

2

3 Supplementary Figure 1: Fitted parameters, “a” and “b”, for the TM and CM evolutions.

4 On the top is the average “a”, the fitted exponential term, for the 6 replicate populations

5 of each strain/condition pairing. On the bottom is “b”, the fitted lag term. Errors bars are

6 one s.d. (n = 6 independently evolved populations each).

7

8

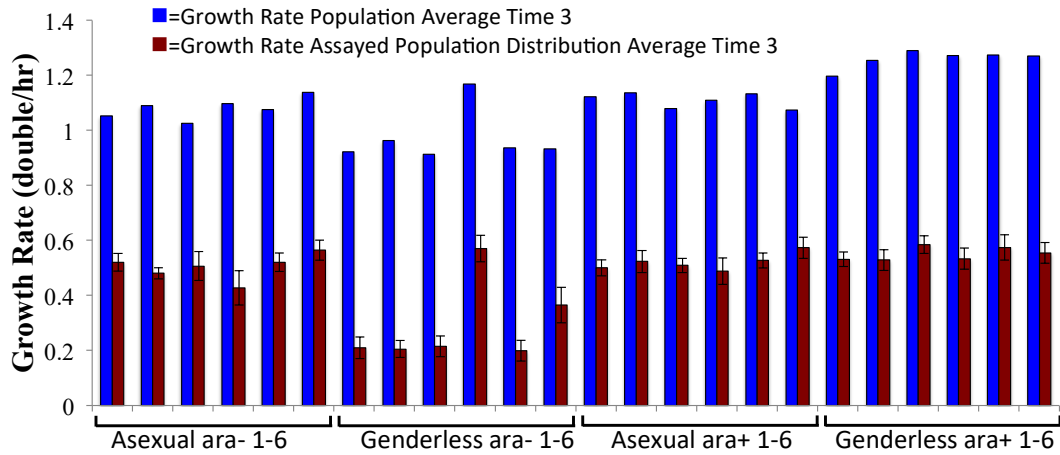

9

10 Supplementary Figure 2: The growth rates measured at Time = 3 during the evolution  
11 (blue) are compared to the fitness distributions measured in the populations at Time = 3  
12 (red). Population fitness data was based on 96 randomly chosen colonies. Errors bars are  
13 one s.d. (n = 96 independent colonies).

14

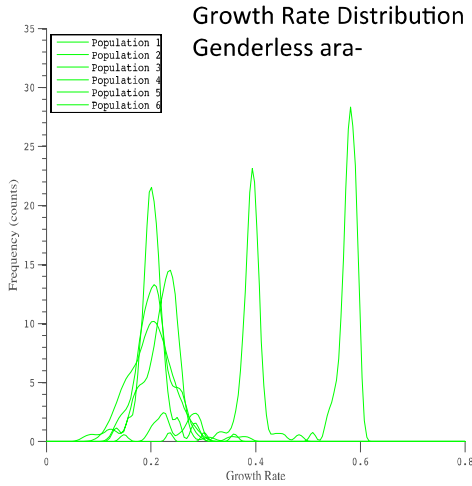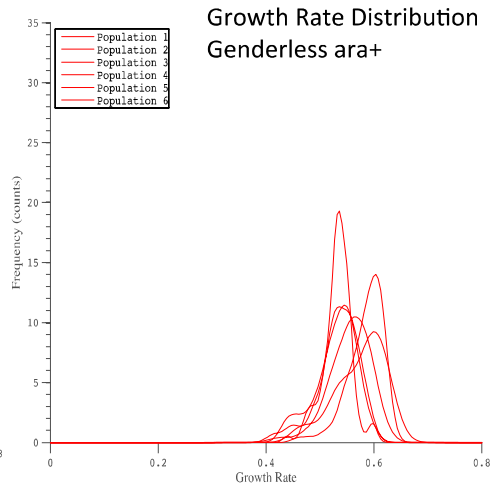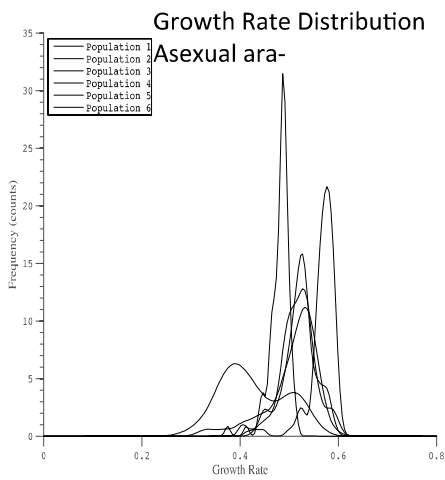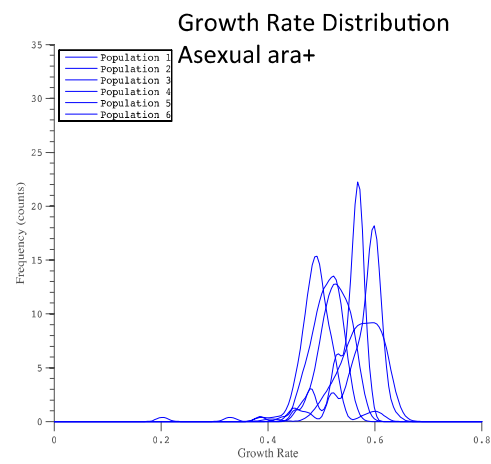

15

16 Supplementary Figure 3: Growth rate distributions of each set of evolved populations at  
 17 Time = 3 for the growth rate on glycerol evolution. Distribution based on 96 randomly  
 18 chosen colonies.

19

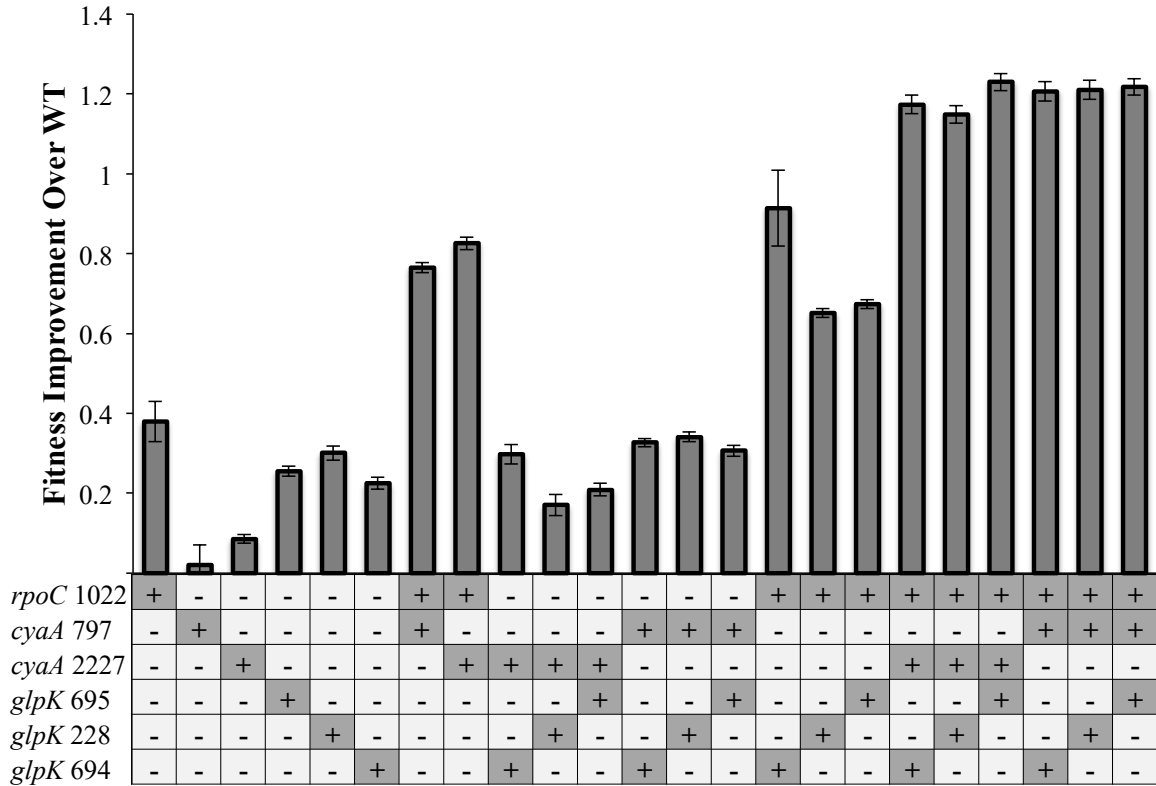

20

21 Supplementary Figure 4: The relative fitness improvement over the wild-type of each  
 22 reconstructed mutant for strain MG1655. Dark gray box with a '+': mutated genotype.  
 23 White box with a '-': wild-type genotype. Error bars are s.e.m. (n = 15 biological  
 24 replicates for single mutant and wild-type and n = 9 biological replicates for double and n  
 25 = 6 biological replicates for triple mutants).

26

27

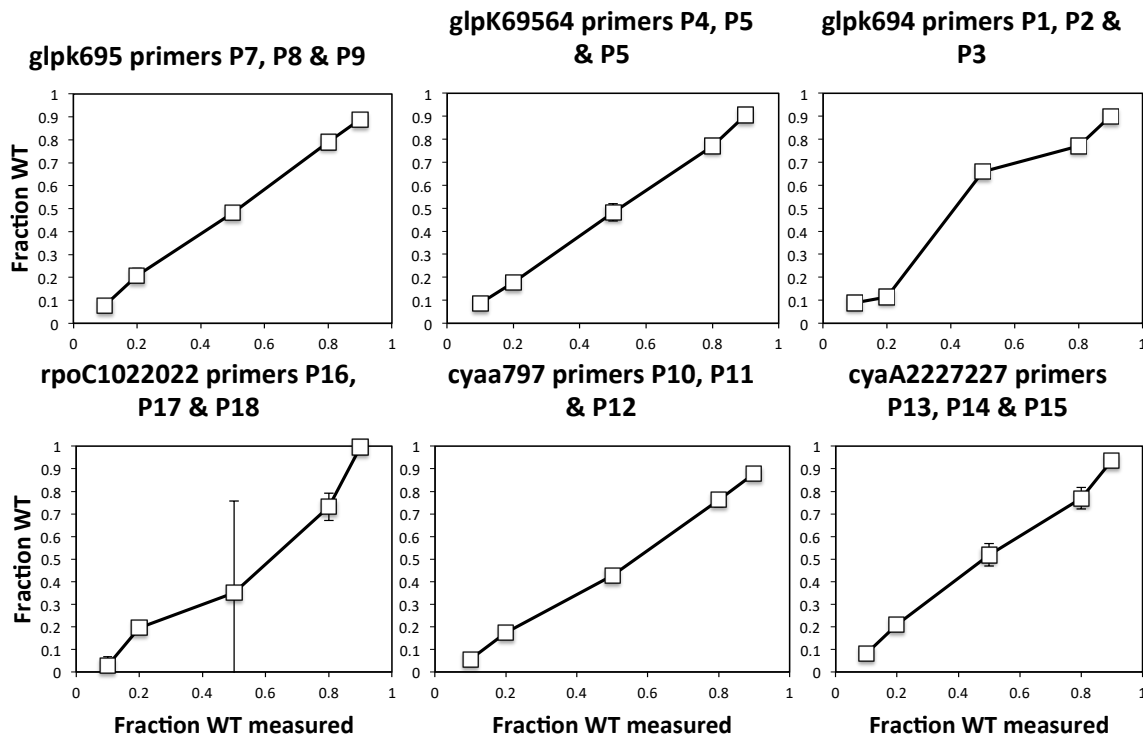

28

29 Supplementary Figure 5: Calibration curves for each set of primers used to measure allele  
 30 frequency, comparing measured DNA composition (wild type to mutant) versus true  
 31 composition, errors bars are one s.d. (n = 3 technical replicates each).

32

33

34 Supplementary Table 1: Curated mutation list from each sequenced population and time.

| Population  | Gene             | Location  | Mutation | Frequency |
|-------------|------------------|-----------|----------|-----------|
| GIG1 Time 1 | <i>curA</i>      | 519       | A→C      | 11.70%    |
| GIG1 Time 1 | <i>rpoC</i>      | 1022      | A→G      | 12.00%    |
| GIG1 Time 1 | <i>leuQ</i>      | 80        | .→G      | 11.60%    |
| GIG1 Time 2 | <i>mraZ</i>      | 238       | C→T      | 12.60%    |
| GIG1 Time 2 | <i>glsA</i>      | 829       | G→A      | 10.90%    |
| GIG1 Time 2 | <i>cyaA</i>      | 797       | T→C      | 24.00%    |
| GIG1 Time 2 | <i>glpK</i>      | 695       | C→T      | 11.30%    |
| GIG1 Time 2 | <i>glpK</i>      | 694       | C→T      | 15.60%    |
| GIG1 Time 2 | <i>glpK</i>      | 288       | C→A      | 23.90%    |
| GIG1 Time 2 | <i>azoR1</i>     | 150-161   | -12 bp   | 7.50%     |
| GIG1 Time 2 | <i>rpoC</i>      | 1022      | A→G      | 83.00%    |
| GIG1 Time 3 | <i>lpxC/secM</i> | +91/-140  | G→T      | 12.80%    |
| GIG1 Time 3 | <i>cof/ybaO</i>  | +34/-119  | T→.      | 10.60%    |
| GIG1 Time 3 | <i>ubiF/glnX</i> | +153/+1   | G→T      | 10.30%    |
| GIG1 Time 3 | <i>cyaA</i>      | 797       | T→C      | 45.10%    |
| GIG1 Time 3 | <i>cyaA</i>      | 2227      | C→T      | 29.80%    |
| GIG1 Time 3 | <i>glpK</i>      | 695       | C→T      | 44.10%    |
| GIG1 Time 3 | <i>glpK</i>      | 288       | C→A      | 42.50%    |
| GIG1 Time 3 | <i>azoR1</i>     | 150-161   | -12 bp   | 26.30%    |
| GIG1 Time 3 | <i>rpoC</i>      | 1022      | A→G      | 100.00%   |
| GIG2 Time 1 | <i>ygfA/traM</i> | -220/-194 | A→C      | 11.00%    |
| GIG2 Time 1 | <i>traJ</i>      | 124       | .→T      | 10.80%    |
| GIG2 Time 1 | <i>ccmB</i>      | 149       | G→A      | 14.90%    |
| GIG2 Time 1 | <i>pdxK</i>      | 315       | G→A      | 25.00%    |
| GIG2 Time 1 | <i>gspB</i>      | 202       | C→T      | 29.00%    |
| GIG2 Time 1 | <i>rpoC</i>      | 1022      | A→G      | 25.70%    |
| GIG2 Time 2 | <i>miaB</i>      | 1306      | G→A      | 11.70%    |
| GIG2 Time 2 | <i>treA</i>      | 1372      | A→G      | 11.60%    |
| GIG2 Time 2 | <i>rsxC</i>      | 2012      | C→A      | 10.00%    |
| GIG2 Time 2 | <i>gspB</i>      | 202       | C→T      | 10.60%    |
| GIG2 Time 2 | <i>cyaA</i>      | 1378      | A→G      | 19.50%    |
| GIG2 Time 2 | <i>glpK</i>      | 196       | C→T      | 27.10%    |
| GIG2 Time 2 | <i>glpK</i>      | 164       | G→A      | 53.00%    |
| GIG2 Time 2 | <i>rpoC</i>      | 1022      | A→G      | 72.00%    |
| GIG2 Time 2 | <i>traJ</i>      | 126       | .→T      | 59.30%    |
| GIG2 Time 2 | <i>rpoC</i>      | 1401      | -18 bp   | 13.40%    |

|             |                  |           |        |         |
|-------------|------------------|-----------|--------|---------|
| GIG2 Time 2 | <i>hrpB/mrcB</i> | +85/-111  | T→G    | 10.80%  |
| AIG1 Time 1 | <i>bcsQ</i>      | 218       | A→C    | 29.80%  |
| AIG1 Time 1 | <i>glpK</i>      | 694       | C→T    | 18.10%  |
| AIG1 Time 1 | <i>glpK</i>      | 164       | G→A    | 11.20%  |
| AIG1 Time 2 | <i>yhjY</i>      | 6         | G→T    | 11.30%  |
| AIG1 Time 2 | <i>glpK</i>      | 238       | A→G    | 88.40%  |
| AIG1 Time 2 | <i>rpoB</i>      | 1330      | G→T    | 10.80%  |
| AIG1 Time 2 | <i>rpoB</i>      | 1576      | C→T    | 77.60%  |
| AIG1 Time 3 | <i>glpK</i>      | 238       | A→G    | 100.00% |
| AIG1 Time 3 | <i>rpoB</i>      | 1576      | C→T    | 100.00% |
| AIG2 Time 1 | <i>sseA/sseB</i> | +371/+447 | G→T    | 15.50%  |
| AIG2 Time 1 | <i>glpK</i>      | 695       | C→T    | 19.90%  |
| AIG2 Time 1 | <i>glpK</i>      | 692       | C→T    | 13.80%  |
| AIG2 Time 1 | <i>glpK</i>      | 565       | G→T    | 27.80%  |
| AIG2 Time 2 | <i>glpK</i>      | 565       | G→T    | 87.20%  |
| AIG2 Time 2 | <i>rpoB</i>      | 1927      | +64 bp | 37.70%  |
| AIG2 Time 3 | <i>glpK</i>      | 565       | G→T    | 100.00% |
| AIG2 Time 3 | <i>rpoB</i>      | 1927      | +64 bp | 100.00% |

35

36

37 Supplementary Table 2: p-values for comparisons of growth rates between single mutant  
 38 constructs.

|                 | Wild Type | <i>rpoC1022</i> | <i>cyaA797</i> | <i>cyaA2227</i> | <i>glpK695</i> | <i>glpK288</i> | <i>glpK694</i> |
|-----------------|-----------|-----------------|----------------|-----------------|----------------|----------------|----------------|
| Wild Type       | 1         | -               | -              | -               | -              | -              | -              |
| <i>rpoC1022</i> | 2.15E-07  | 1               | -              | -               | -              | -              | -              |
| <i>cyaA797</i>  | 0.0107    | 0.000720        | 1              | -               | -              | -              | -              |
| <i>cyaA2227</i> | 0.000199  | 0.0445          | 0.135          | 1               | -              | -              | -              |
| <i>glpK695</i>  | 9.25E-19  | 4.75E-08        | 4.45E-13       | 1.85E-10        | 1              | -              | -              |
| <i>glpK288</i>  | 1.17E-15  | 0.000234        | 5.63E-10       | 3.10E-07        | 2.13E-06       | 1              | -              |
| <i>glpK694</i>  | 1.61E-17  | 7.17E-07        | 1.93E-12       | 1.16E-09        | 0.195          | 0.00210        | 1              |

39

40

41



42 Supplementary Table 3: p-values for comparisons of growth rates between double/triple  
 43 mutant constructs and their composite mutations.

| Genotype                                             | WT         | rpoC      | cyaA     | glpK      | rpoC+cyaA | rpoC+glpK | cyaA+glpK |
|------------------------------------------------------|------------|-----------|----------|-----------|-----------|-----------|-----------|
| <i>rpoC1022</i><br><i>cyaA2227</i>                   | 4.49E-10   | 7.23E-05  | 1.11E-06 | -         | -         | -         | -         |
| <i>rpoC1022</i><br><i>cyaA797</i>                    | 6.22E-09   | 0.000178  | 3.59E-07 | -         | -         | -         | -         |
| <i>cyaA2227</i><br><i>glpK694</i>                    | 8.66E-14   | -         | 6.01E-11 | 0.0472    | -         | -         | -         |
| <i>cyaA2227</i><br><i>glpK288</i>                    | 1.46E-14   | -         | 4.23E-08 | 0.00121   | -         | -         | -         |
| <i>cyaA2227</i><br><i>glpK695</i>                    | 1.48E-07   | -         | 5.42E-06 | 0.114     | -         | -         | -         |
| <i>cyaA797</i><br><i>glpK694</i>                     | 1.70E-10   | -         | 7.70E-06 | 0.452     | -         | -         | -         |
| <i>cyaA797</i><br><i>glpK288</i>                     | 2.39E-11   | -         | 7.42E-08 | 0.00173   | -         | -         | -         |
| <i>cyaA797</i><br><i>glpK695</i>                     | 1.94E-16   | -         | 1.11E-09 | 0.0261    | -         | -         | -         |
| <i>rpoC1022</i><br><i>glpK694</i>                    | 8.45E-19   | 6.613E-14 | -        | 2.42E-09  | -         | -         | -         |
| <i>rpoC1022</i><br><i>glpK288</i>                    | 2.65E-21   | 9.23E-17  | -        | 7.638E-18 | -         | -         | -         |
| <i>rpoC1022</i><br><i>glpK695</i>                    | 2.04E-18   | 3.89E-14  | -        | 3.83E-09  | -         | -         | -         |
| <i>rpoC1022</i><br><i>cyaA2227</i><br><i>glpK694</i> | 1.34E-11   | 3.54E-10  | 1.10E-10 | 2.54E-08  | 1.86E-07  | 0.000383  | 5.97E-07  |
| <i>rpoC1022</i><br><i>cyaA2227</i><br><i>glpK288</i> | 9.00E-11   | 2.05E-09  | 8.03E-10 | 2.34E-08  | 9.94E-07  | 0.0159    | 1.16E-06  |
| <i>rpoC1022</i><br><i>cyaA2227</i><br><i>glpK695</i> | 6.861E-11  | 4.06E-10  | 3.97E-10 | 3.11E-08  | 1.48E-07  | 0.000566  | 8.12E-06  |
| <i>rpoC1022</i><br><i>cyaA797</i><br><i>glpK694</i>  | 7.5229E-13 | 2.22E-11  | 1.07E-12 | 1.10E-09  | 2.10E-08  | 2.84E-05  | 1.27E-09  |
| <i>rpoC1022</i><br><i>cyaA797</i><br><i>glpK288</i>  | 1.29E-19   | 4.70E-12  | 8.24E-14 | 2.08E-15  | 3.06E-10  | 1.03E-06  | 1.28E-11  |
| <i>rpoC1022</i><br><i>cyaA797</i><br><i>glpK695</i>  | 6.97E-15   | 1.00E-11  | 2.00E-13 | 1.38E-10  | 8.20E-09  | 0.000190  | 9.76E-09  |

44

45

46 Supplementary Table 4: Strains utilized in this study.

| Strain                                             | Source                          |
|----------------------------------------------------|---------------------------------|
| MG1655                                             | CGSC                            |
| genderless (BW25113 HFR-2xoriT-SFX)                | Winkler et al 2012 <sup>1</sup> |
| BW25113 2xoriT                                     | Winkler et al 2012 <sup>1</sup> |
| genderless $\lambda$ ::[Pbad- <i>dam kan</i> ]     | this work                       |
| BW25113 2xoriT $\lambda$ ::[Pbad- <i>dam kan</i> ] | this work                       |
| BW25113 <i>rpoC1022</i>                            | this work                       |
| BW25113 <i>cyaA797</i>                             | this work                       |
| BW25113 <i>cyaA2227</i>                            | this work                       |
| BW25113 <i>glpK695</i>                             | this work                       |
| BW25113 <i>glpK228</i>                             | this work                       |
| BW25113 <i>glpK694</i>                             | this work                       |
| BW25113 <i>cyaA797 glpK695</i>                     | this work                       |
| BW25113 <i>cyaA797 glpK228</i>                     | this work                       |
| BW25113 <i>cyaA797 glpK694</i>                     | this work                       |
| BW25113 <i>cyaA2227 glpK695</i>                    | this work                       |
| BW25113 <i>cyaA2227 glpK228</i>                    | this work                       |
| BW25113 <i>cyaA2227 glpK694</i>                    | this work                       |
| BW25113 <i>rpoC1022 cyaA797</i>                    | this work                       |
| BW25113 <i>rpoC1022 cyaA2227</i>                   | this work                       |
| BW25113 <i>rpoC1022 glpK695</i>                    | this work                       |
| BW25113 <i>rpoC1022 glpK228</i>                    | this work                       |
| BW25113 <i>rpoC1022 glpK694</i>                    | this work                       |
| BW25113 <i>rpoC1022 cyaA797 glpK695</i>            | this work                       |
| BW25113 <i>rpoC1022 cyaA797 glpK228</i>            | this work                       |
| BW25113 <i>rpoC1022 cyaA797 glpK694</i>            | this work                       |
| BW25113 <i>rpoC1022 cyaA2227 glpK695</i>           | this work                       |
| BW25113 <i>rpoC1022 cyaA2227 glpK228</i>           | this work                       |
| BW25113 <i>rpoC1022 cyaA2227 glpK694</i>           | this work                       |
| genderless <i>rpoC1022</i>                         | this work                       |
| genderless <i>cyaA797</i>                          | this work                       |
| genderless <i>cyaA2227</i>                         | this work                       |
| genderless <i>glpK695</i>                          | this work                       |
| genderless <i>glpK228</i>                          | this work                       |
| genderless <i>glpK694</i>                          | this work                       |
| MG1655 <i>rpoC1022</i>                             | this work                       |

|                                         |           |
|-----------------------------------------|-----------|
| MG1655 <i>cyaA797</i>                   | this work |
| MG1655 <i>cyaA2227</i>                  | this work |
| MG1655 <i>glpK695</i>                   | this work |
| MG1655 <i>glpK228</i>                   | this work |
| MG1655 <i>glpK694</i>                   | this work |
| MG1655 <i>cyaA797 glpK695</i>           | this work |
| MG1655 <i>cyaA797 glpK228</i>           | this work |
| MG1655 <i>cyaA797 glpK694</i>           | this work |
| MG1655 <i>cyaA2227 glpK695</i>          | this work |
| MG1655 <i>cyaA2227 glpK228</i>          | this work |
| MG1655 <i>cyaA2227 glpK694</i>          | this work |
| MG1655 <i>rpoC1022 cyaA797</i>          | this work |
| MG1655 <i>rpoC1022 cyaA2227</i>         | this work |
| MG1655 <i>rpoC1022 glpK695</i>          | this work |
| MG1655 <i>rpoC1022 glpK228</i>          | this work |
| MG1655 <i>rpoC1022 glpK694</i>          | this work |
| MG1655 <i>rpoC1022 cyaA797 glpK695</i>  | this work |
| MG1655 <i>rpoC1022 cyaA797 glpK228</i>  | this work |
| MG1655 <i>rpoC1022 cyaA797 glpK694</i>  | this work |
| MG1655 <i>rpoC1022 cyaA2227 glpK695</i> | this work |
| MG1655 <i>rpoC1022 cyaA2227 glpK228</i> | this work |
| MG1655 <i>rpoC1022 cyaA2227 glpK694</i> | this work |

47  
48

49 Supplementary Table 5: Primers utilized in this study.

| Name | Sequence 5'->3'                                                                      |
|------|--------------------------------------------------------------------------------------|
| P1   | CCG AAG TAT ACG GTC AGA CTA ACA TTG CCG                                              |
| P2   | TTC CGA AGT ATA CGG TCA GAC TAA CAT TGC CA                                           |
| P3   | CTC GCC AGT GTT CAT CAG CAT AAA GCA G                                                |
| P4   | CCAG ACA ATG GCG TTA TAG ATA GGC                                                     |
| P5   | GCC AGA CAA TGG CGT TAT AGA TAG GA                                                   |
| P6   | CTC CAC GCT GGT AGA AGT GCT G                                                        |
| P7   | TAC GCG TGC CGC CTG TGC                                                              |
| P8   | GAA TAC GCG TGC CGC CTG TGT                                                          |
| P9   | CCG ATT ACA CCA ACG CCT CTC GTA C                                                    |
| P10  | CCC CAT ACA AAG CGG TAC TGA AAA AAC T                                                |
| P11  | CCC CAT ACA AAG CGG TAC TGA AAA AAC C                                                |
| P12  | CAC GGC TGA GCT TTT CGC AC                                                           |
| P13  | TTT GCC AGC GAA GGG ATC TTC C                                                        |
| P14  | TTT GCC AGC GAA GGG ATC TTC T                                                        |
| P15  | GTT GAT GAA GCT TGA GCC GTA GG                                                       |
| P16  | GGT AAA CAG GGT CGT TTC CGT CTG AA                                                   |
| P17  | GGT AAA CAG GGT CGT TTC CGT CTG AG                                                   |
| P18  | GCG GAT AAC TTC GTC CAG GAT ATC C                                                    |
| P19  | CGTAAAAACCCGCTTCGGCG                                                                 |
| P20  | ACATCCCACAACCTGCGATT                                                                 |
| P21  | CCTCGCTGGGTGTGGAAGTC                                                                 |
| P22  | AGCAGGCGGGTGAAACAGTC                                                                 |
| P23  | CAT CGC TTC CAG CAC GTC AC                                                           |
| P24  | GAT TGG TCT ACT GAT TGC GGT CAT TG                                                   |
| P25  | GCGAAGATTGTGGCTCCACCCAGCATATACTGCTGCTTGACGAATTTTATATC AAA<br>GGG AAA ACT GTC CAT AT  |
| P26  | CGGATAAGCCTCGCTTTCCGGCACGTTTCATCACGAAAAATATTGCTGTAATGT GAC<br>GGA AGA TCA CTT CG     |
| P27  | CAACGCATAGTTCACCTTCGCCAGTCGGGCCGCAGGCGATGGTGGTCAGCAATC AAA<br>GGG AAA ACT GTC CAT AT |
| P28  | TTCAGAACAAAAAGCTTCGCTGTAATATGACTACGGGACAATTAACATGTGT GAC<br>GGA AGA TCA CTT CG       |
| P29  | GGCAAGGATTCGATACTATTCCTGTGTAACCTTCTTAAGGAACGAGAATGATC AAA<br>GGG AAA ACT GTC CAT AT  |
| P30  | TGGCGAAACCCACCTTAAGGTGGGTTTTGTTATTTTGGGGCTGAGGAAGTGT GAC<br>GGA AGA TCA CTT CG       |
| P31  | CAGTAGAATTCATG AAG AAA AAT CGC GCT TTT TTG                                           |
| P32  | CAC TTG AAT TCC ATC CGC TTC TCC TTG AGA ATT A                                        |
| P33  | TTGTCGGTGAACGCTCTCCT                                                                 |
| P34  | CACATTGATTATTGCACGG                                                                  |
| P35  | CGTTCATCTTTCCTGGT                                                                    |
| P36  | AGGATGCGTCATCGCCATTA                                                                 |
| P37  | GGCATCACGGCAATATAC                                                                   |
| P38  | TCTGGTCTGGTAGCAATG                                                                   |
| P39  | ACTTAACGGCTGACATGG                                                                   |
| P40  | ACGAGTATCGAGATGGCA                                                                   |

50  
51  
52

53 Supplementary References

54

- 55 1. Winkler, J. & Kao, K. C. Harnessing recombination to speed adaptive evolution  
56 in *Escherichia coli*. *Metab Eng* **14**, 487–495 (2012).
